# Supplementary material for: A Drug Screening Revealed Novel Potential Agents against Malignant Pleural Mesothelioma
Source: MDPI journal article supplement (doi:10.3390/cancers14102527), 2022-05-20

## 10-Deacetylaccatin

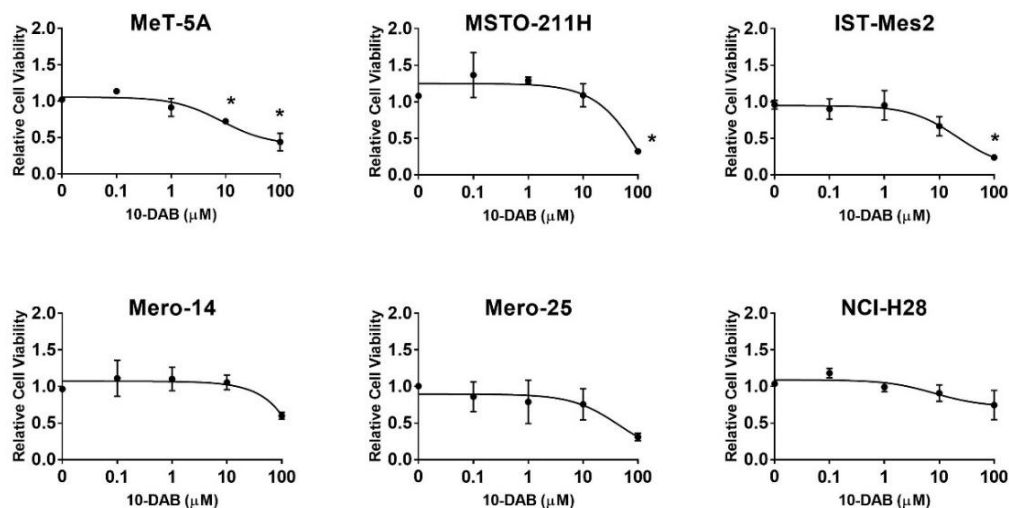

## 9-Aminoacridine

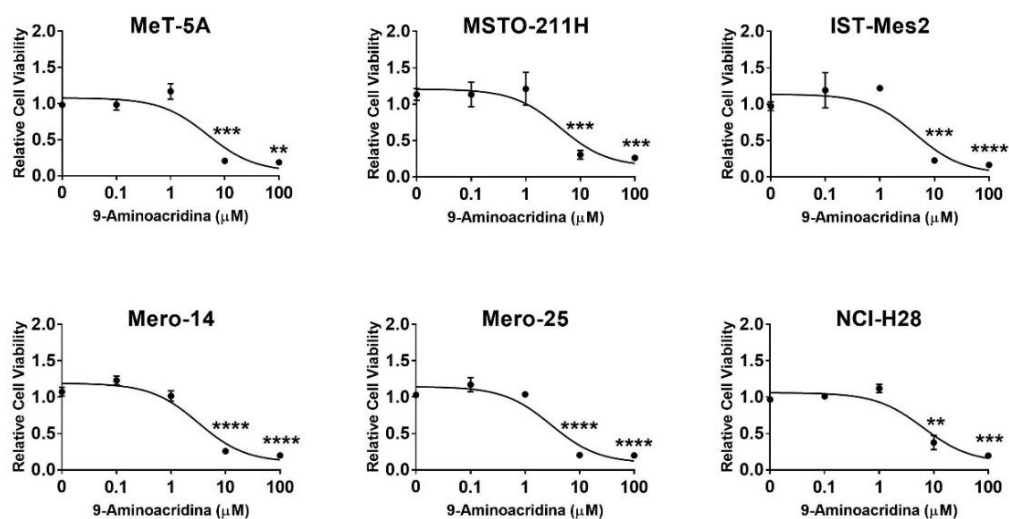

## Albendazole

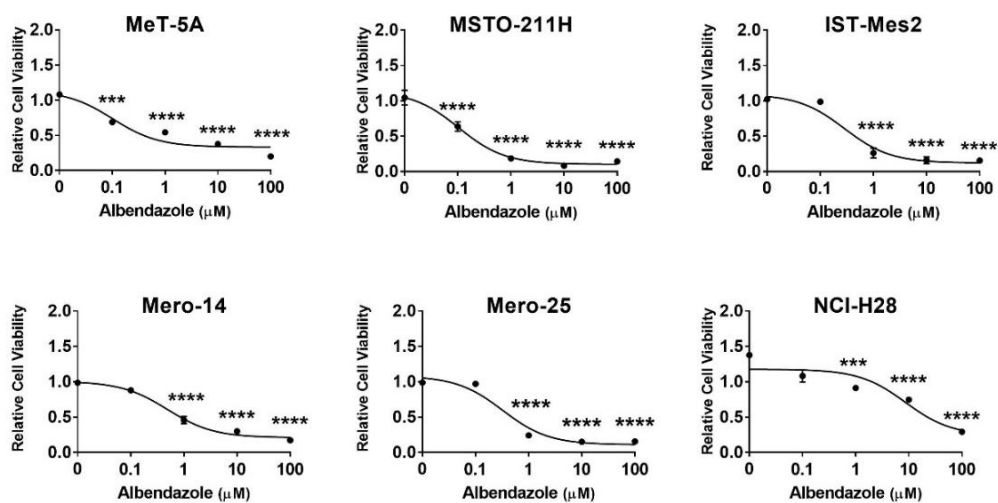

## Alexidine

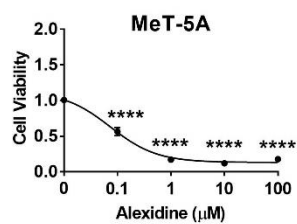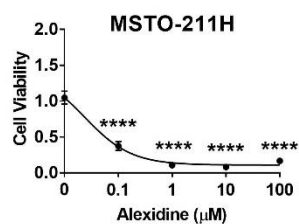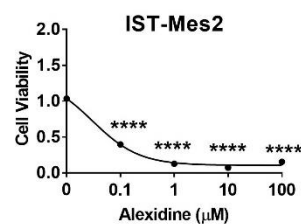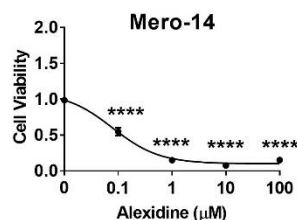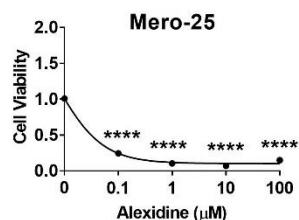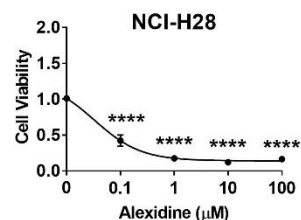

## Allylthiourea

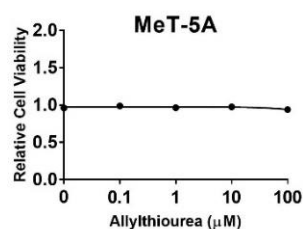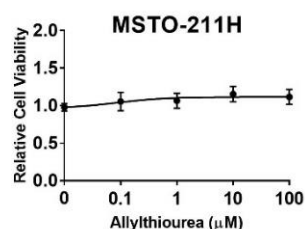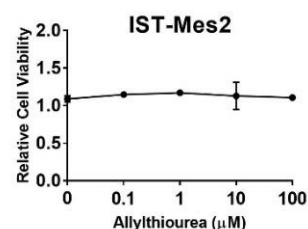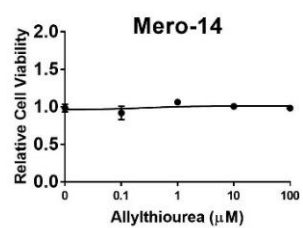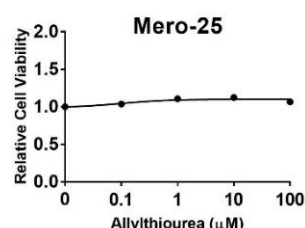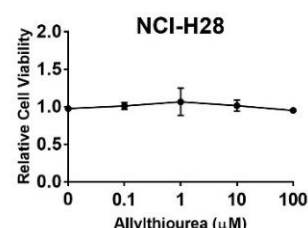

## Azelastine hydrochloride

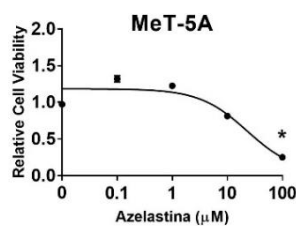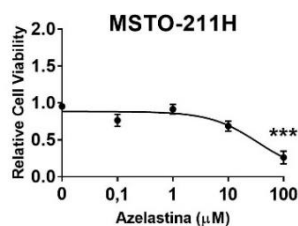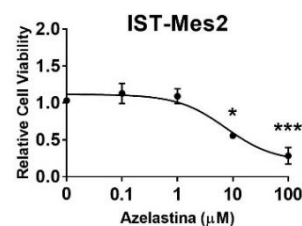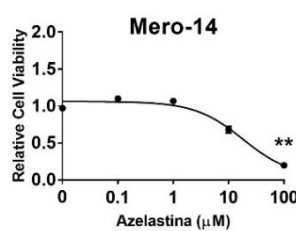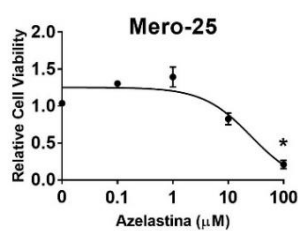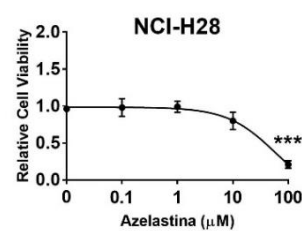

## Bazedoxifene hydrochloride

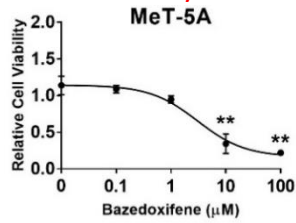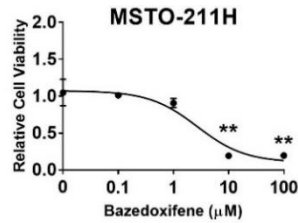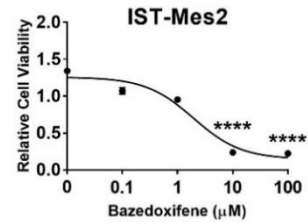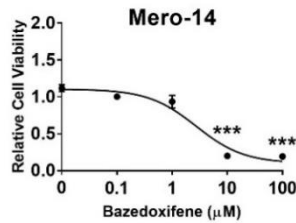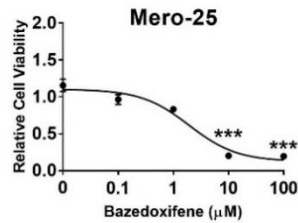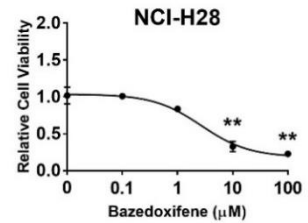

## Bosutinib

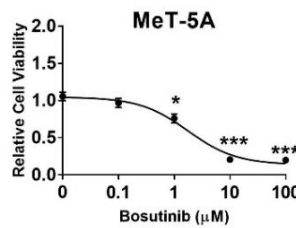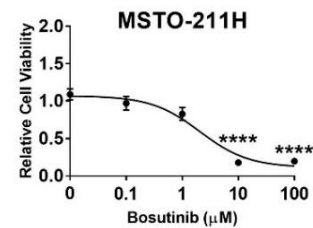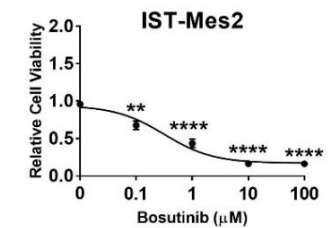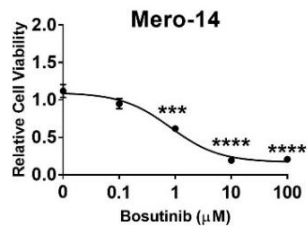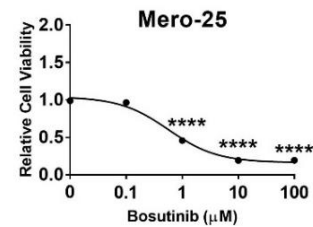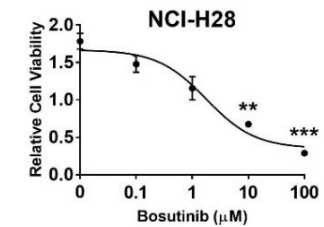

## Carmofur

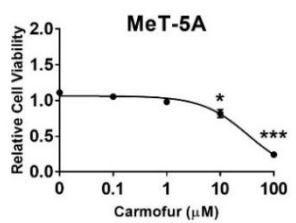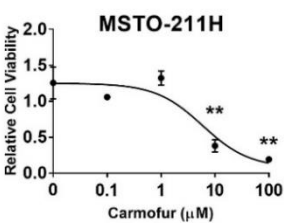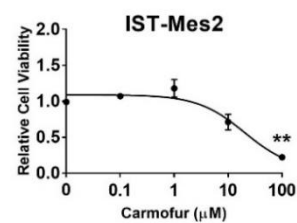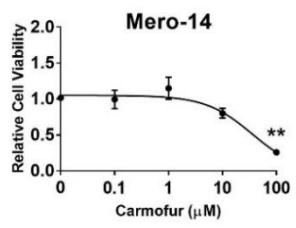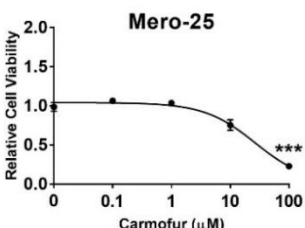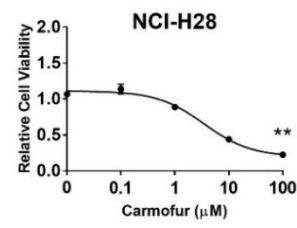

## Cephalomannine

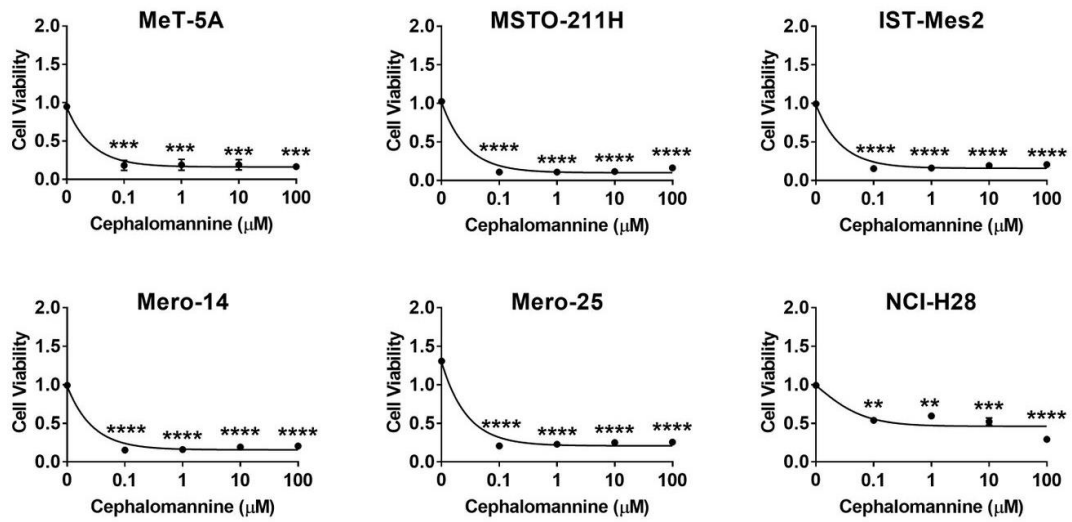

## Cetrimonium bromide

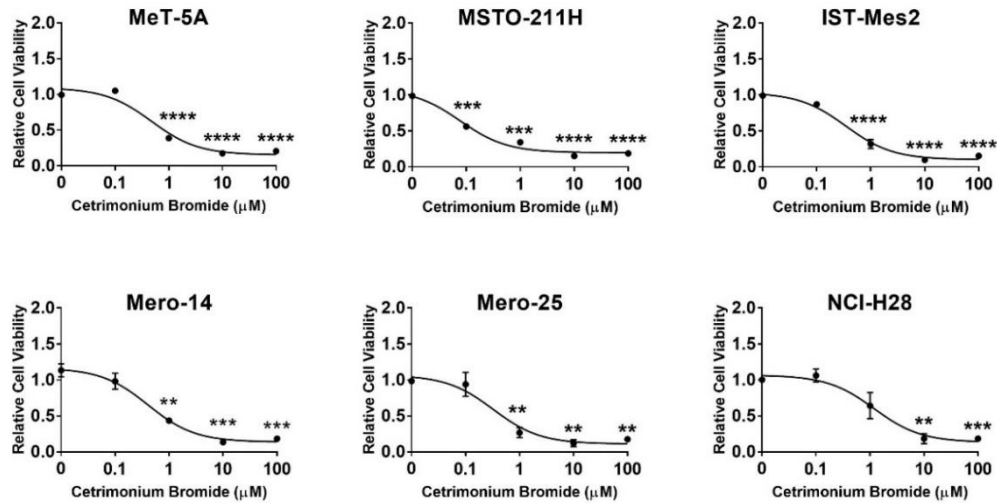

## Ciclopirox

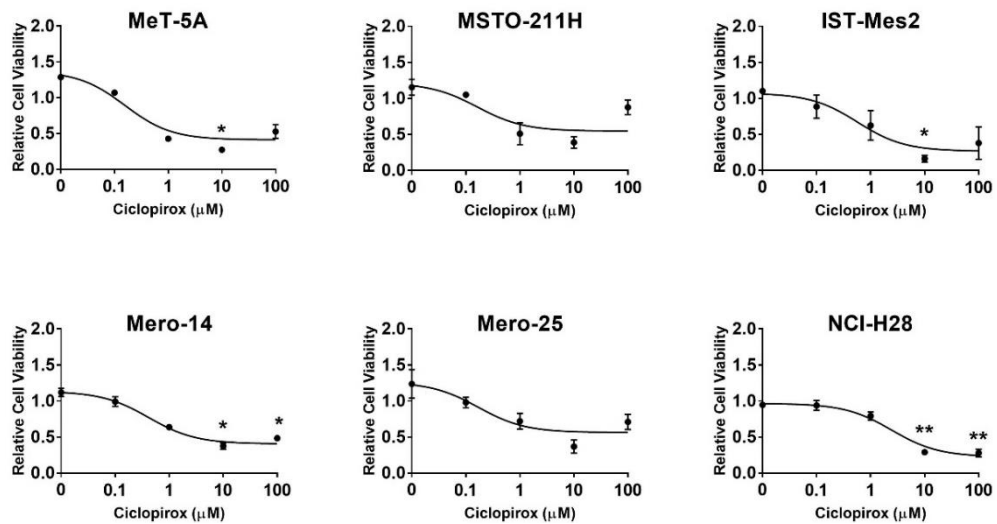

## Cladribine

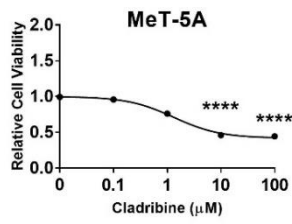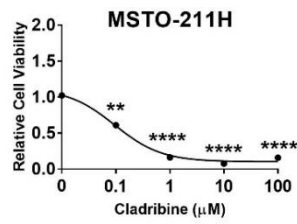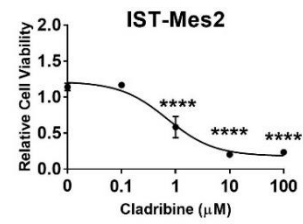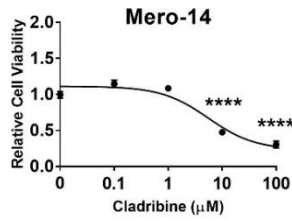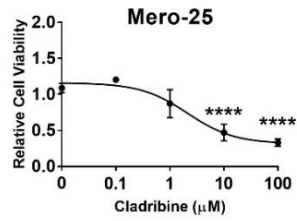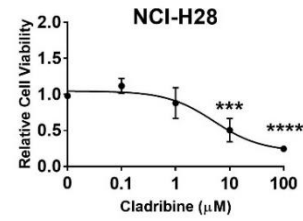

## Clomifene citrate

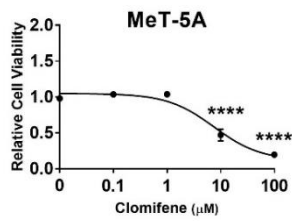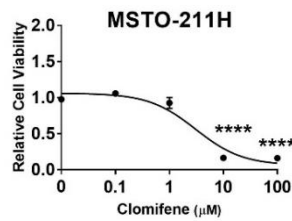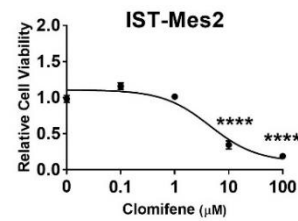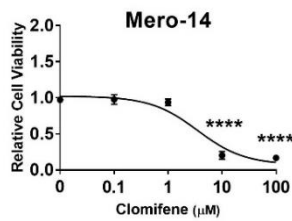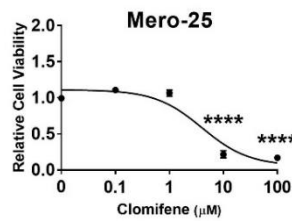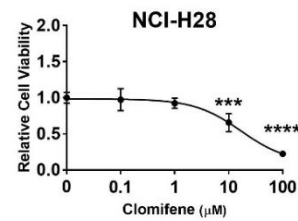

## Cytarabine

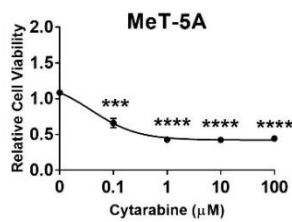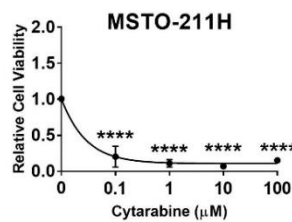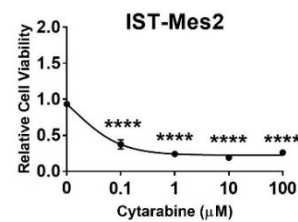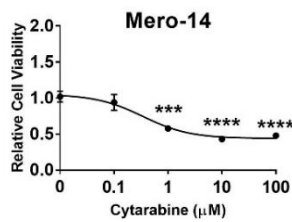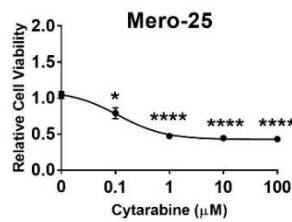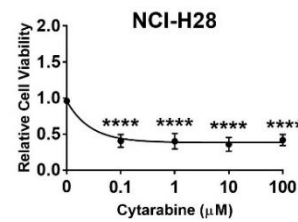

## Digoxigenin

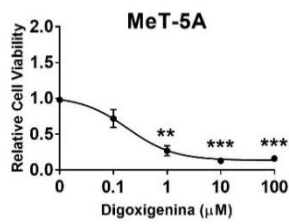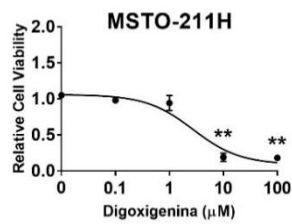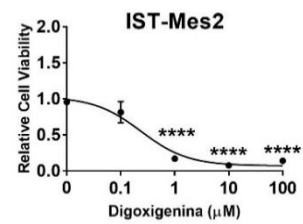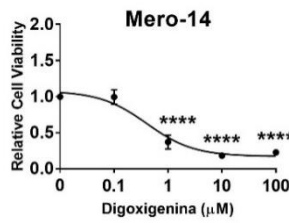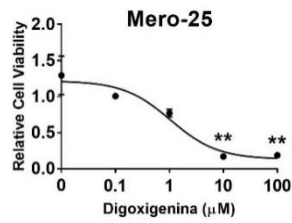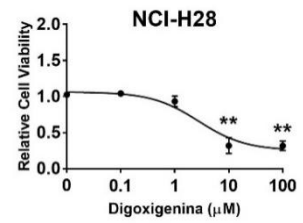

## Dronedarone hydrochloride

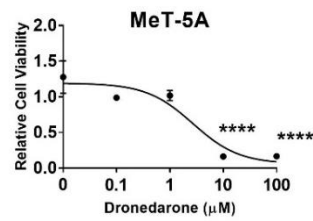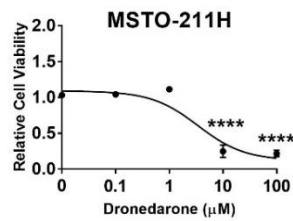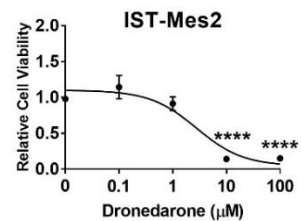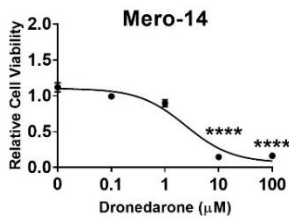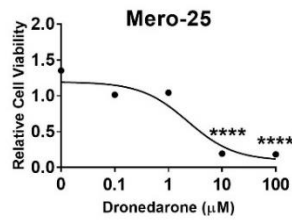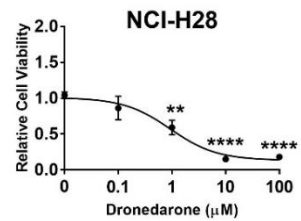

## Emetine

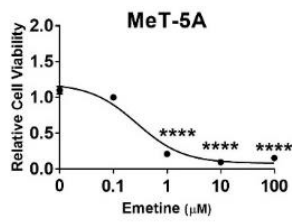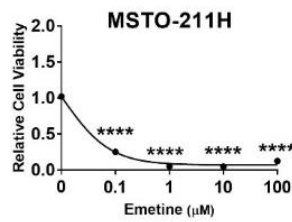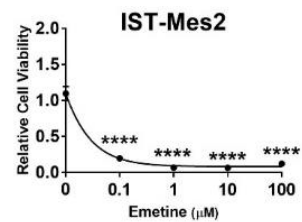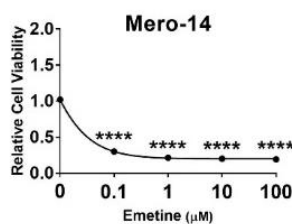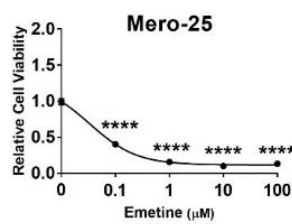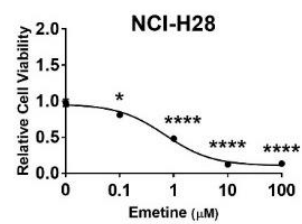

## Fenbendazole

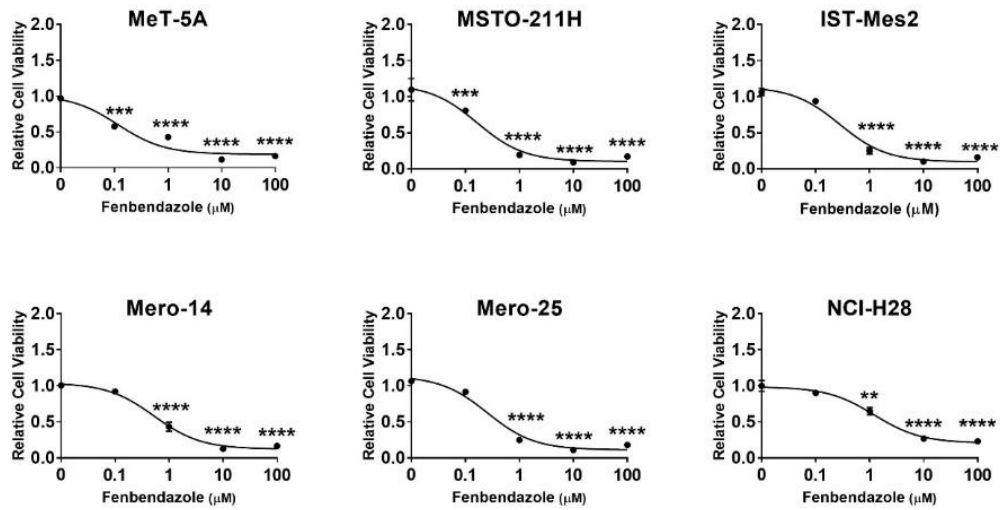

## Flubendazole

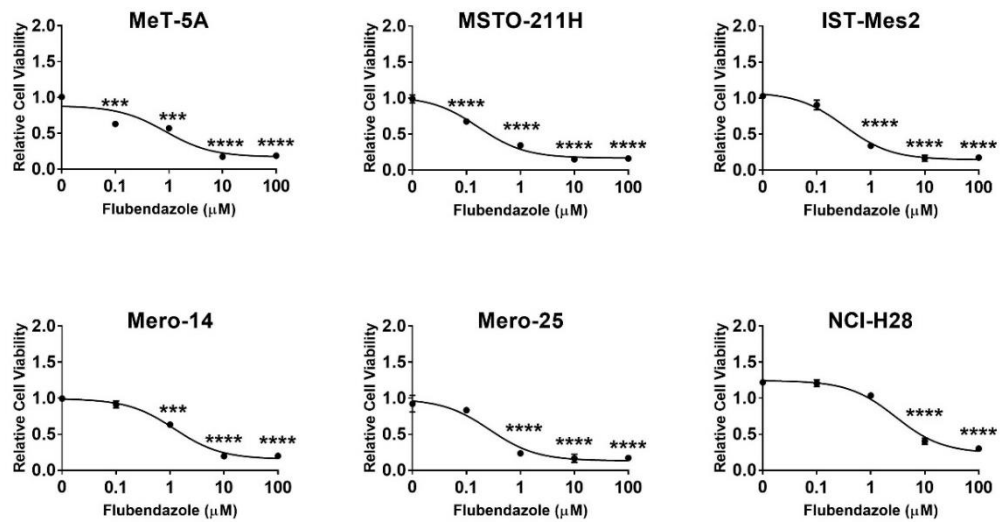

## Gemcitabine hydrochloride

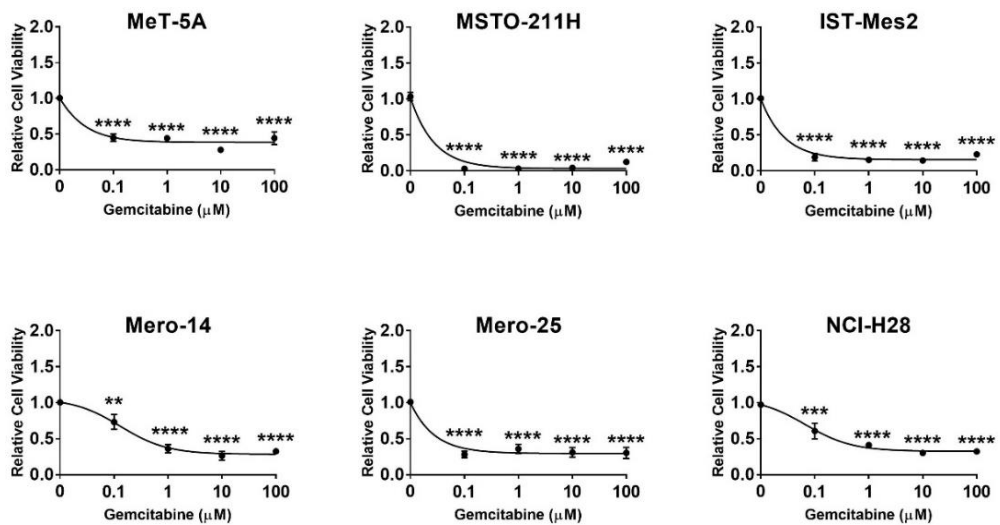

## Miconazole

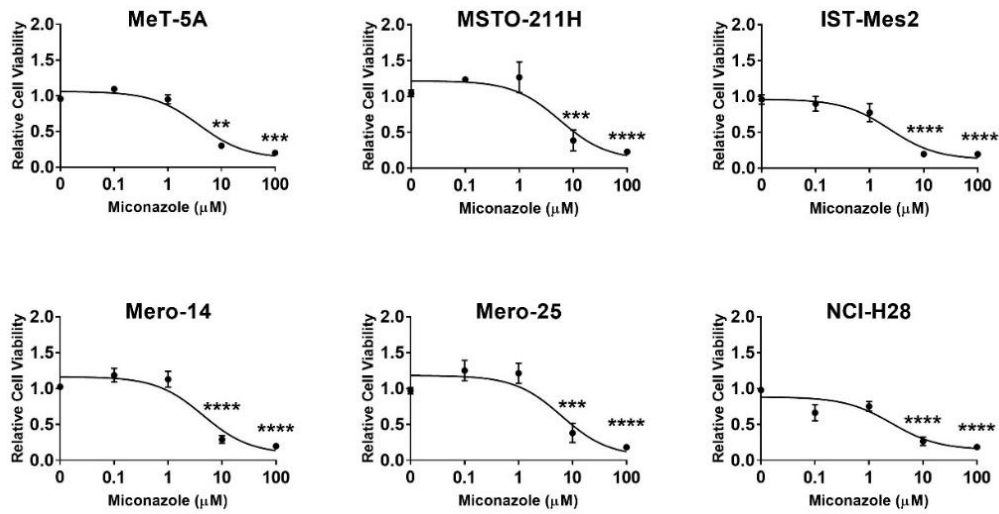

## Niclosamide

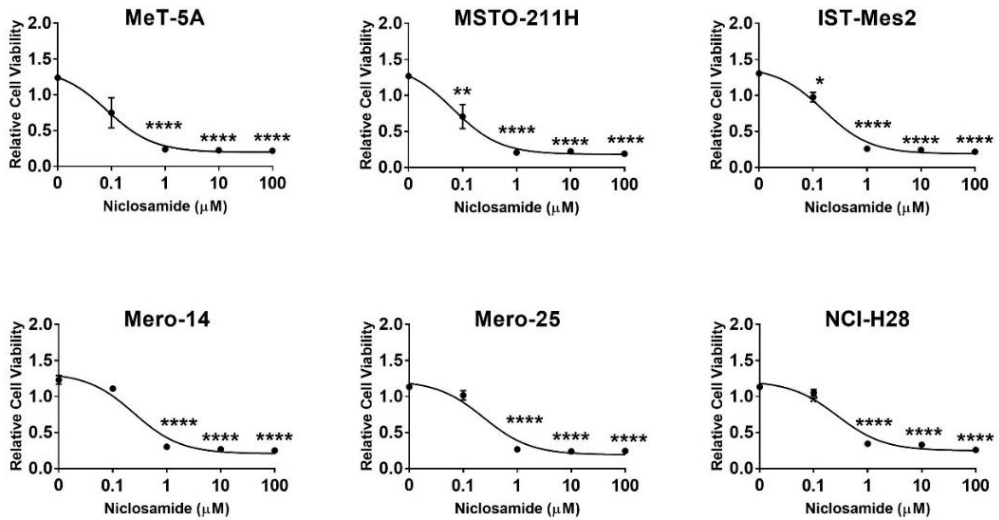

## Ouabain

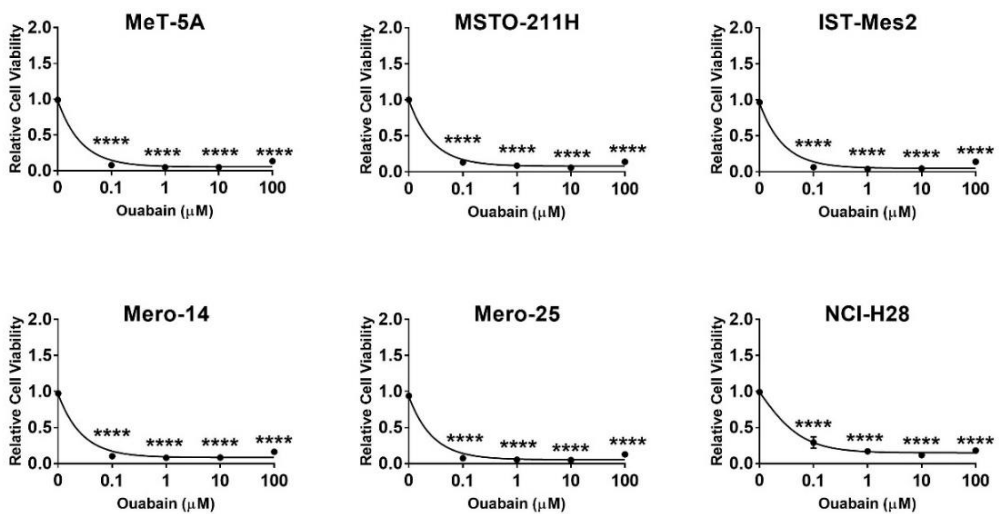

## Oxethazaine

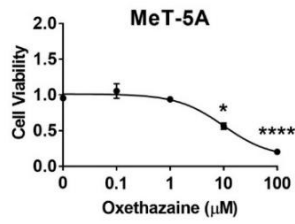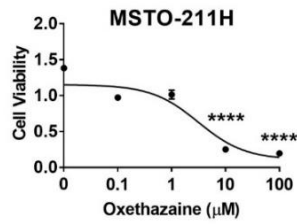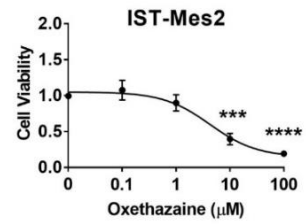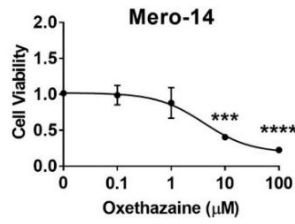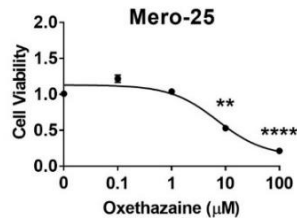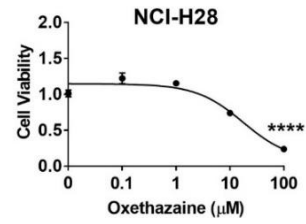

## Penfluridol

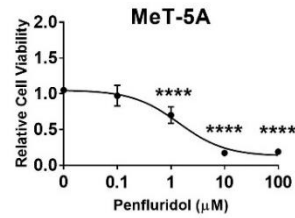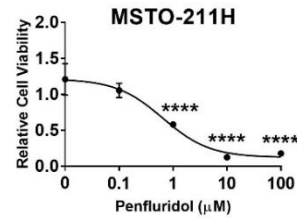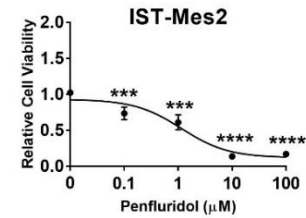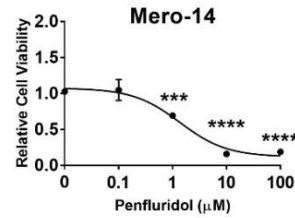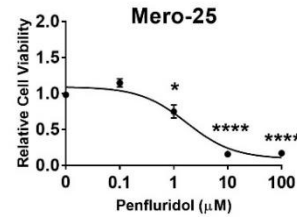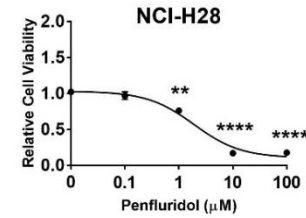

## Pentamidine

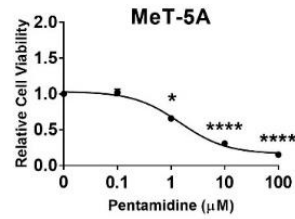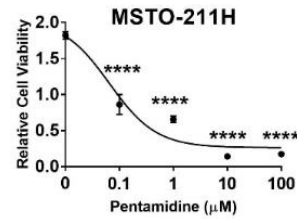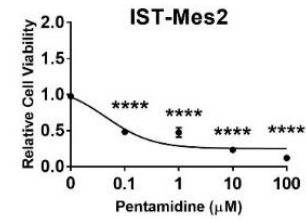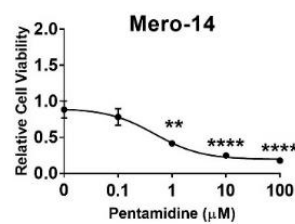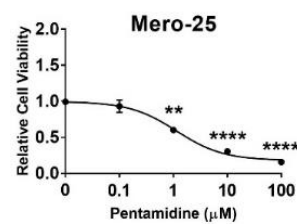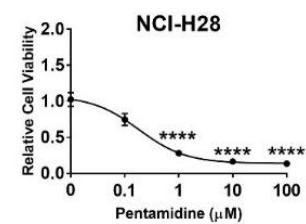

Pitavastatin calcium

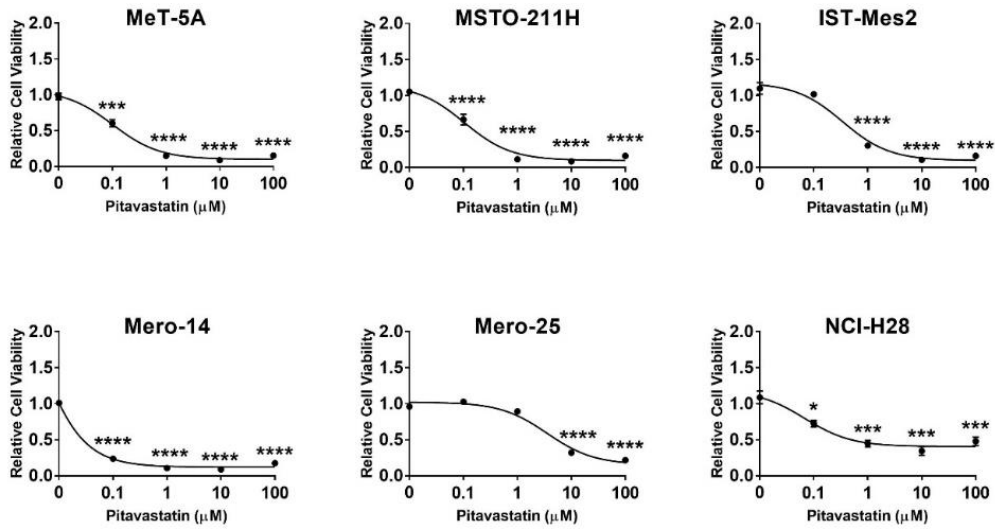

Pralatrexate

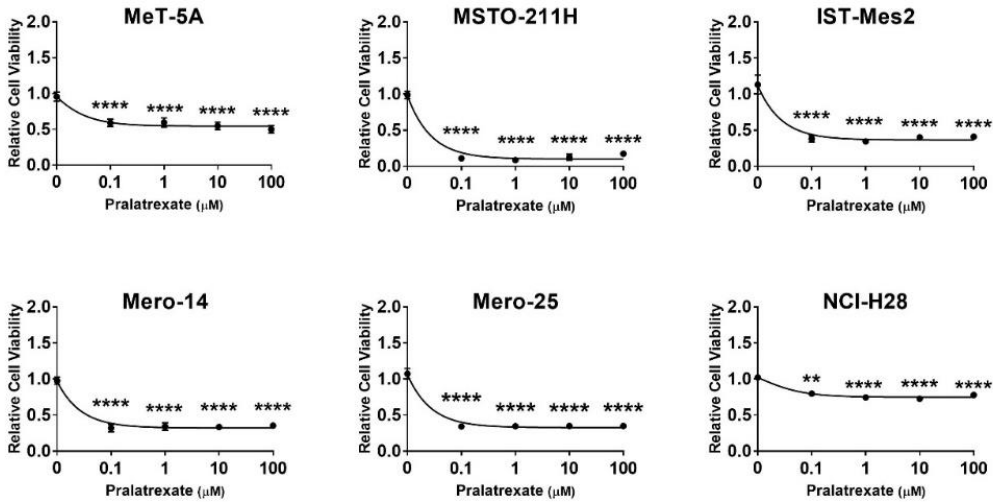

Pyrrithione zinc

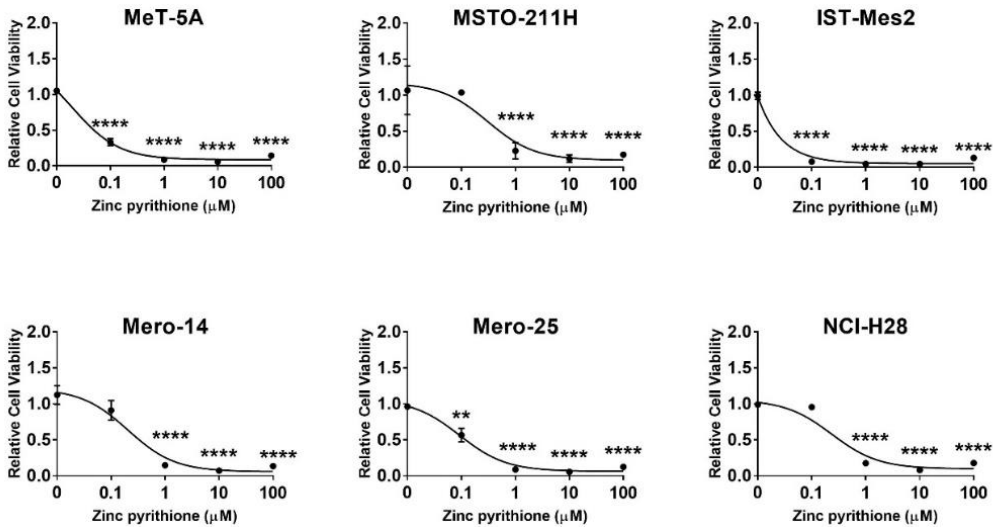

Sertraline hydrochloride

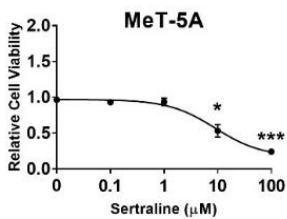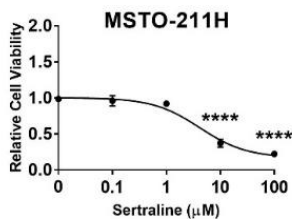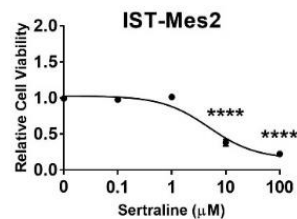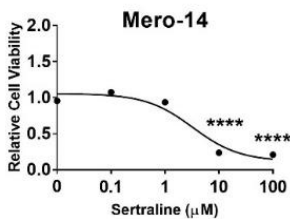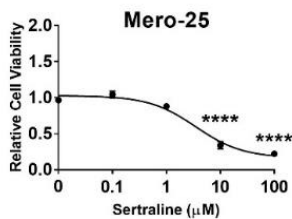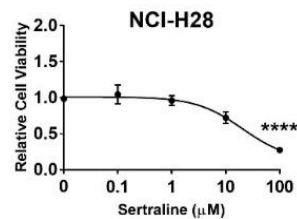

Solifenacin succinate

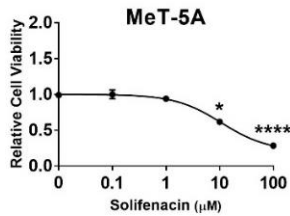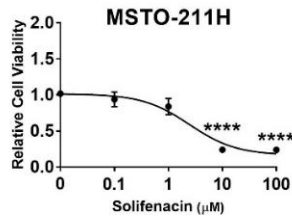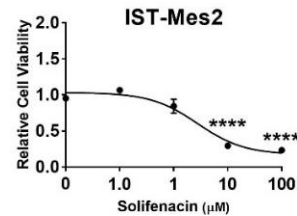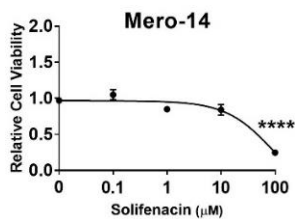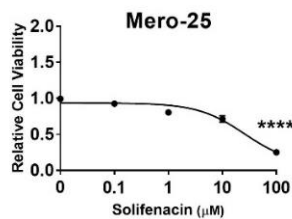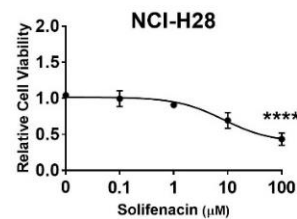

Sulconazole nitrate

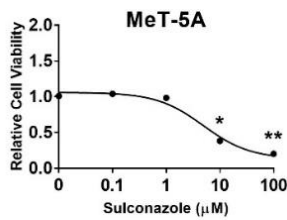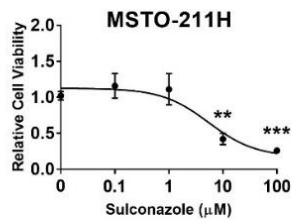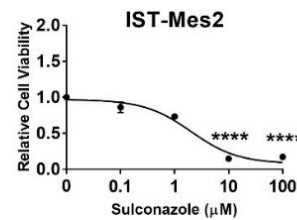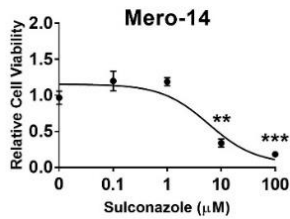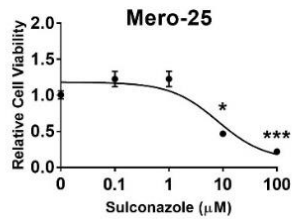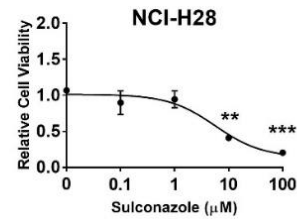

Tadalafil

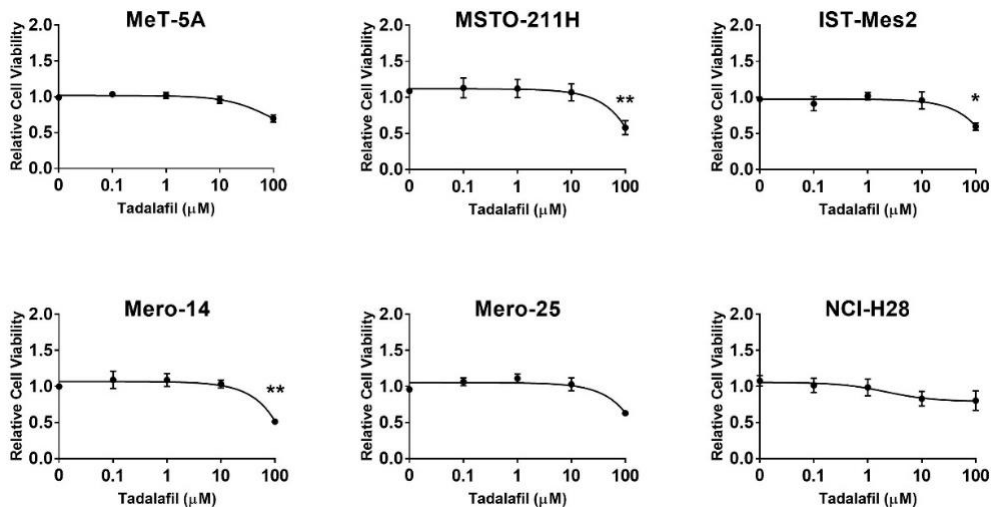

Terfenadine

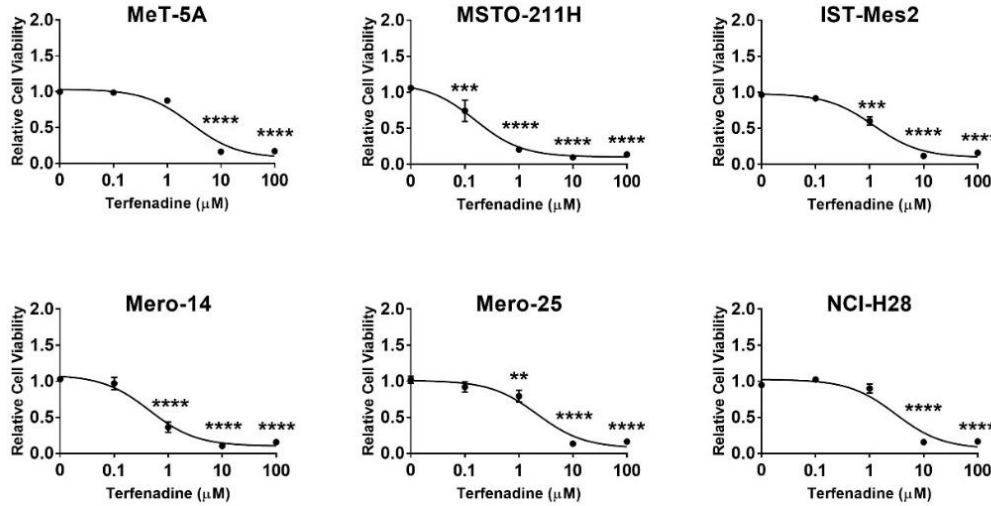

Thioguanine

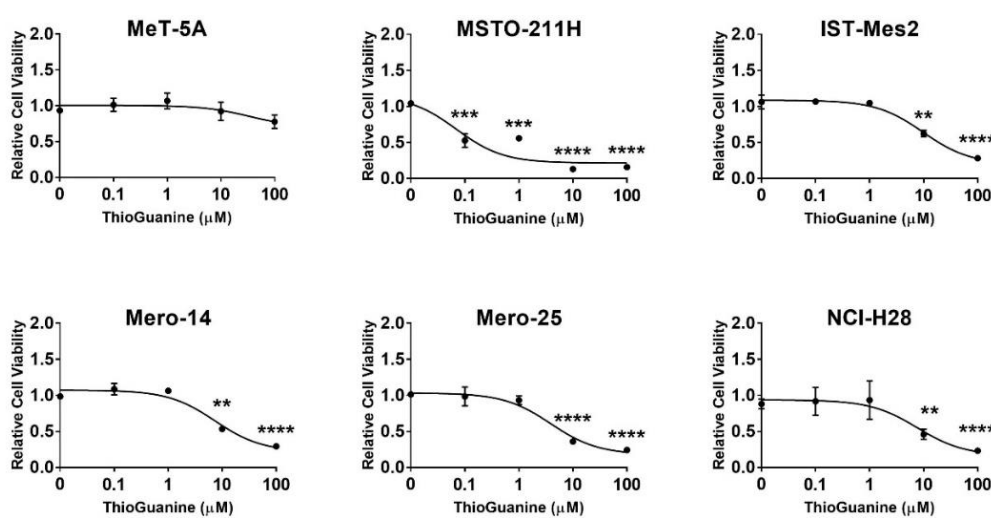

Thioridazine hydrochloride

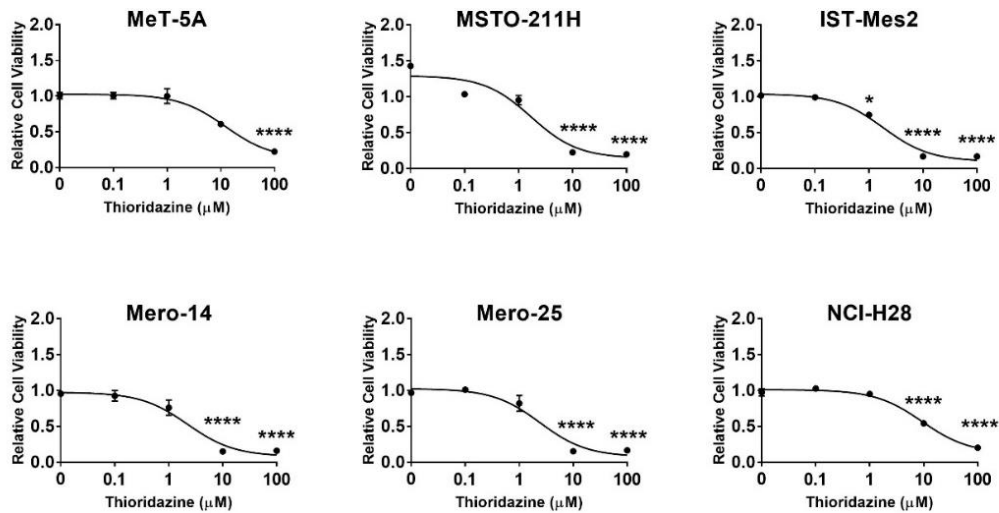

Thonzonium bromide

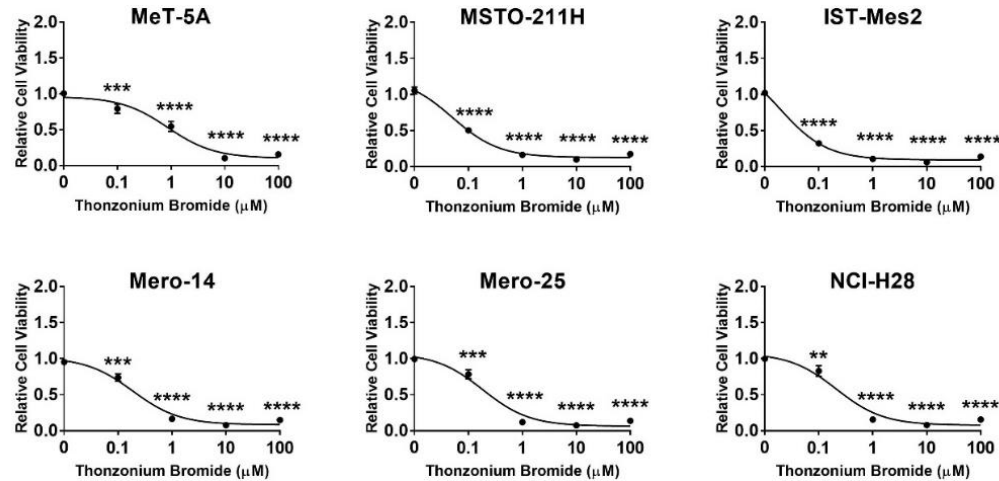

Tioconazole

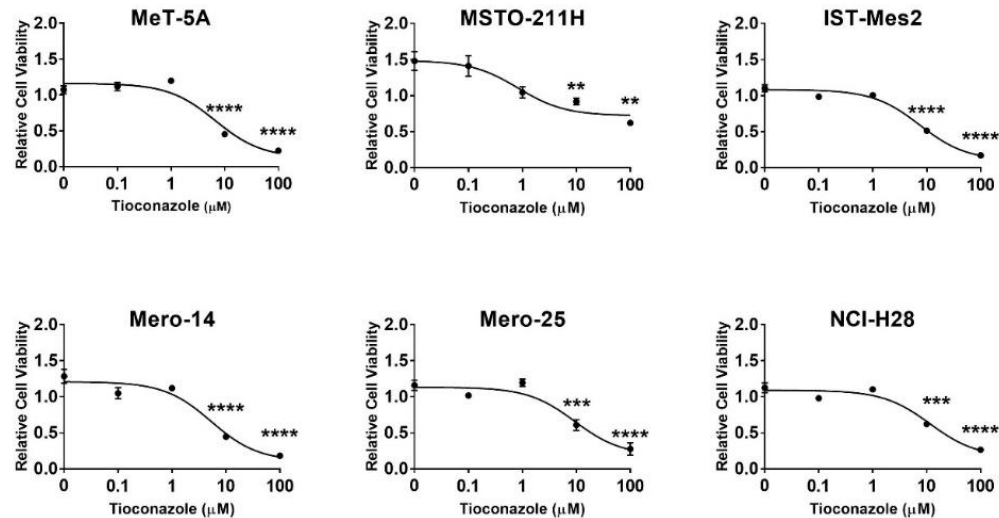

Toremifene citrate

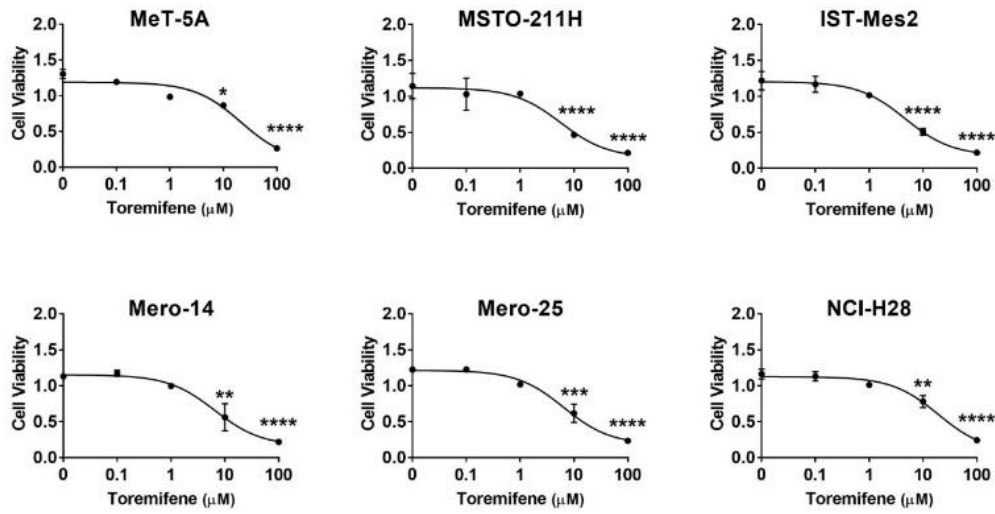

Trifluridine

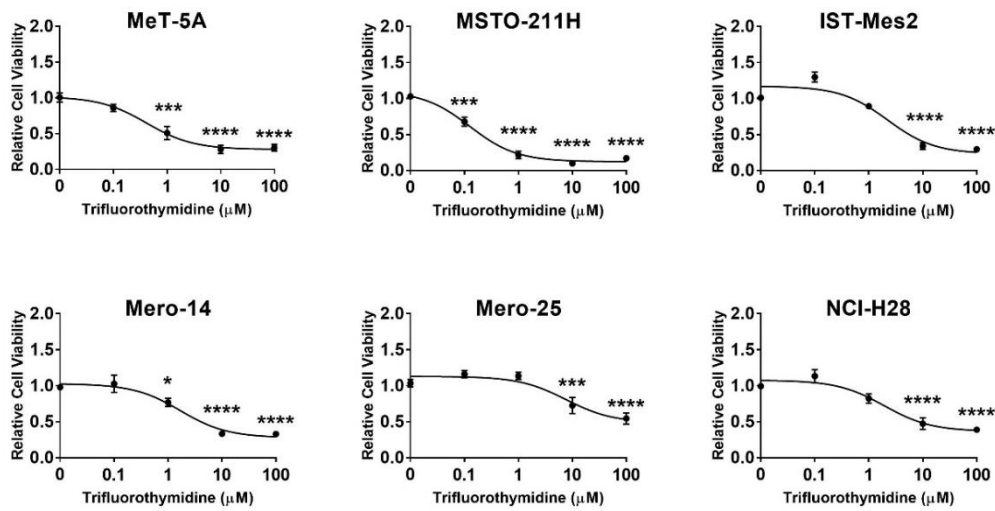

Vinorelbine

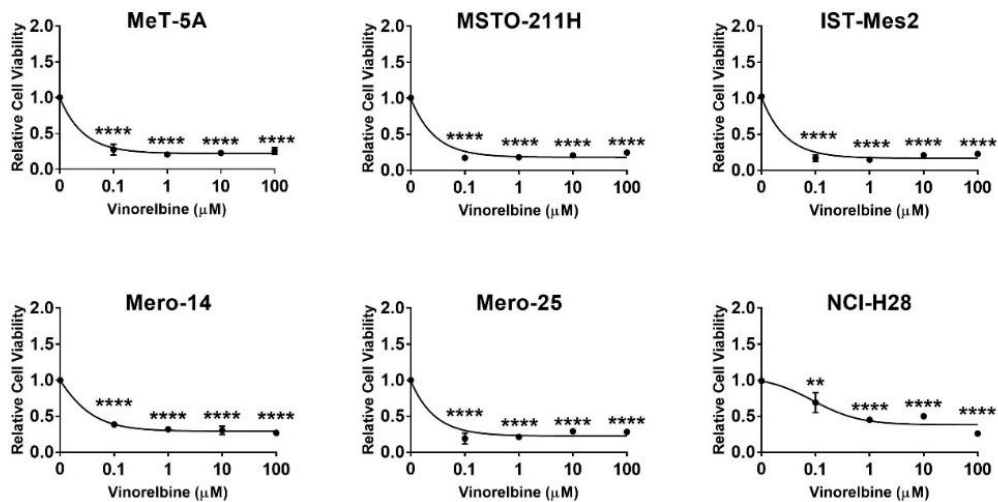

Supplement: s1 [file s1]
